# Supplementary material for: Infant Feeding Pattern Clusters Are Associated with Childhood Health Outcomes
Source: MDPI journal article supplement (doi:10.3390/nu15133065), 2023-07-07
Supplement: s1 [file s1]

**Supplementary Table S1. Definitions of childhood diseases**

| <b>Disease</b>                           | <b>Definitions</b>                                                                                                                                                                           |
|------------------------------------------|----------------------------------------------------------------------------------------------------------------------------------------------------------------------------------------------|
| Upper respiratory tract disorders        |                                                                                                                                                                                              |
| Adenotonsillectomy                       | Procedure of tonsillectomy or adenoidectomy <sup>1</sup>                                                                                                                                     |
| Chronic otitis media                     | A principal diagnosis of ICD-10 H65.X–H67.X and procedure of myringotomy or insertion of ventilation tube                                                                                    |
| Hospitalization for croup                | Hospitalization with a principal diagnosis of ICD-10 code (J04.X–J05.X) <sup>2</sup>                                                                                                         |
| Hospitalization for URI                  | Hospitalization with a principal diagnosis of ICD-10 codes (J00.X–J03.X, and J06.X)                                                                                                          |
| Lower respiratory tract disorders        |                                                                                                                                                                                              |
| Hospitalization for pneumonia            | Hospitalization with a principal diagnosis of ICD-10 code (J12.X–J18.X) <sup>3</sup>                                                                                                         |
| Hospitalization for LRI                  | Hospitalization with a principal diagnosis of ICD-10 code (J20.X–J22.X)                                                                                                                      |
| Hospitalization for asthma               | Hospitalization with a principal diagnosis of ICD-10 code (J45.X–J46.X) <sup>4</sup>                                                                                                         |
| Gastrointestinal disorders               |                                                                                                                                                                                              |
| Hospitalization for gastroenteritis      | Hospitalization with a principal diagnosis of ICD-10 code (A00.X–A09.X)                                                                                                                      |
| Irritable bowel syndrome                 | Hospital visits more than one time with ICD-10 codes (K58.X and R10.X) or one or more hospital visits with ICD-10 codes (K59.1, K52.2, K52.8, or K59.0) after 4 years of age <sup>5, 6</sup> |
| Neurologic and behavioral disorders      |                                                                                                                                                                                              |
| Attention-deficit hyperactivity disorder | Diagnosis of ICD-10 code (F90.X) after 6 years of age <sup>7</sup>                                                                                                                           |
| Febrile convulsion                       | Diagnosis of ICD-10 code (R56.X)                                                                                                                                                             |
| Epilepsy                                 | Diagnosis of ICD-10 code (G40.X–G41.X) with two or more prescriptions of antiepileptic drugs within 6 months <sup>8</sup>                                                                    |
| Immunological disorders                  |                                                                                                                                                                                              |
| Kawasaki disorder                        | Hospitalization with ICD-10 code (M30.3) with prescription of intravenous immunoglobulin <sup>9</sup>                                                                                        |
| Idiopathic thrombocytopenic purpura      | Diagnosis of ICD-10 code (D69.3) <sup>10</sup>                                                                                                                                               |
| Cancer                                   | Diagnosis of ICD-10 codes (C00.X–C97.X) <sup>11</sup>                                                                                                                                        |

**Supplementary Table S2. Definitions of perinatal conditions and comorbidities**

| <b>Disease</b>                                                                      | <b>Definitions</b>                                                                                          |
|-------------------------------------------------------------------------------------|-------------------------------------------------------------------------------------------------------------|
| <b><i>Perinatal comorbidities, n (%)</i></b>                                        |                                                                                                             |
| Fetus and newborn affected by maternal conditions                                   | Diagnosis of ICD-10 code P00.X–P04.X                                                                        |
| Birth trauma                                                                        | Diagnosis of ICD-10 code P10.X–P15.X                                                                        |
| Respiratory and cardiovascular disorders specific to the perinatal period           | Diagnosis of ICD-10 code P20.X–P29.X                                                                        |
| Infections specific to the perinatal period                                         | Diagnosis of ICD-10 code P35.X–P39.X                                                                        |
| Hemorrhagic and hematological disorders of fetus and newborn                        | Diagnosis of ICD-10 code P50.X–P61.X                                                                        |
| Transitory endocrine and metabolic disorders specific to fetus and newborn          | Diagnosis of ICD-10 code P70.X–P74.X                                                                        |
| Digestive system disorders of fetus and newborn                                     | Diagnosis of ICD-10 code P75.X–P78.X                                                                        |
| Conditions involving the integument and temperature regulation of fetus and newborn | Diagnosis of ICD-10 code P80.X–P83.X                                                                        |
| <b><i>Comorbidities, n (%)</i></b>                                                  |                                                                                                             |
| Hospitalization for wheezing                                                        | Hospitalization with a principal diagnosis of ICD-10 code J45.X, J46.X, or J21.X                            |
| Atopic dermatitis                                                                   | Diagnosis of ICD-10 code L20.X and two prescriptions of topical steroid                                     |
| Food allergy                                                                        | Diagnosis of ICD-10 code L23.6, L24.6, L25.4, L27.2, T78.0, T78.1, or K52.2 before the first 1 year of life |

**Supplementary Table S3. Results of proLCA function**

| Number of clusters | AIC       | BIC       | G2     | $\chi^2$ | n of estimated parameters | Residual degrees of freedom | Maximum log likelihood | Entropy |
|--------------------|-----------|-----------|--------|----------|---------------------------|-----------------------------|------------------------|---------|
| 2                  | 2,112,834 | 2,113,487 | 36,348 | 59,528   | 63                        | 236,309                     | -1,056,354             |         |
| 3                  | 2,083,888 | 2,084,874 | 13,530 | 16,165   | 95                        | 236,277                     | -1,041,849             |         |
| 4                  | 2,077,217 | 2,077,704 | 7,888  | 7,918    | 127                       | 236,245                     | -1,038,561             |         |
| 5                  | 2,075,898 | 2,077,547 | 6,347  | 6,281    | 159                       | 236,213                     | -1,037,790             |         |
| 6                  | 2,074,637 | 2,076,618 | 5,033  | 4,985    | 191                       | 236,181                     | -1,037,127             |         |
| 7                  | 2,073,335 | 2,075,648 | 3,710  | 3,603    | 223                       | 236,169                     | -1,036,444             |         |
| 8                  | 2,072,537 | 2,075,182 | 2,836  | 2,716    | 255                       | 236,117                     | -1,036,013             |         |
| 9                  | 2,072,445 | 2,075,422 | 2,711  | 2,606    | 287                       | 236,085                     | -1,035,935             |         |
| 10                 | 2,071,856 | 2,075,165 | 1,958  | 1,859    | 319                       | 236,053                     | -1,035,609             |         |

Abbreviations: LCA, latent cluster analysis; AIC, Akaike Information Criterion; BIC, Bayesian Information Criterion; G2, likelihood ratio/deviance statistic;  $\chi^2$ , the chi-square statistic.

**Supplementary Table S4. Risk of childhood diseases according to the cluster of feeding type during infancy<sup>1</sup>**

| Diseases                                 | Cluster 1 (Reference, n=116,372) |                         |            | Cluster 2 (n=108,189) |                         |            |                           | Cluster 3 (n=11,811) |                         |            |                           |
|------------------------------------------|----------------------------------|-------------------------|------------|-----------------------|-------------------------|------------|---------------------------|----------------------|-------------------------|------------|---------------------------|
|                                          | n of event                       | Accumulated n, 1,000 PY | IR/1,000PY | n of event            | Accumulated n, 1,000 PY | IR/1,000PY | aHR <sup>2</sup> (95% CI) | n of event           | Accumulated n, 1,000 PY | IR/1,000PY | aHR <sup>2</sup> (95% CI) |
| Upper respiratory tract disorders        |                                  |                         |            |                       |                         |            |                           |                      |                         |            |                           |
| Adenotonsillectomy                       | 3,873                            | 1,160.6                 | 3.34       | 3,981                 | 1,078.4                 | 3.69       | 1.040 (0.993–1.088)       | 396                  | 117.8                   | 3.36       | 0.965 (0.868–1.074)       |
| Chronic otitis media                     | 912                              | 1,169.0                 | 0.78       | 819                   | 1,087.0                 | 0.75       | 0.955 (0.867–1.052)       | 88                   | 118.7                   | 0.74       | 0.950 (0.759–1.189)       |
| Hospitalization for croup                | 943                              | 1,167.4                 | 0.81       | 935                   | 1,085.0                 | 0.86       | 1.049 (0.956–1.151)       | 127                  | 118.3                   | 1.07       | 1.204 (0.991–1.462)       |
| Hospitalization for URI                  | 3,496                            | 1,154.6                 | 3.03       | 3,497                 | 1,072.4                 | 3.26       | 1.058 (1.009–1.110)       | 491                  | 116.5                   | 4.21       | 1.307 (1.186–1.440)       |
| Lower respiratory tract disorders        |                                  |                         |            |                       |                         |            |                           |                      |                         |            |                           |
| Hospitalization for pneumonia            | 4,258                            | 1,152.2                 | 3.70       | 4,258                 | 1,069.0                 | 3.98       | 1.072 (1.026–1.119)       | 606                  | 115.9                   | 5.23       | 1.349 (1.236–1.472)       |
| Hospitalization for LRI                  | 124                              | 1,172.8                 | 0.11       | 146                   | 1,090.2                 | 0.13       | 1.180 (0.923–1.508)       | 13                   | 119.0                   | 0.11       | 0.810 (0.425–1.544)       |
| Hospitalization for asthma               | 22                               | 1,173.3                 | 0.02       | 32                    | 1,090.7                 | 0.03       | 1.493 (0.864–2.581)       | 2                    | 119.1                   | 0.02       | -                         |
| Gastrointestinal disorders               |                                  |                         |            |                       |                         |            |                           |                      |                         |            |                           |
| Hospitalization for gastroenteritis      | 9,168                            | 1,129.0                 | 8.12       | 9,048                 | 1,046.3                 | 8.65       | 1.037 (1.007–1.069)       | 1,167                | 113.3                   | 10.30      | 1.165 (1.093–1.240)       |
| Irritable bowel syndrome                 | 21,564                           | 1,095.0                 | 19.69      | 20,614                | 1,015.7                 | 20.30      | 1.021 (0.944–1.093)       | 2,226                | 111.1                   | 20.04      | 1.001 (0.967–1.041)       |
| Neurologic and behavioral disorders      |                                  |                         |            |                       |                         |            |                           |                      |                         |            |                           |
| Attention-deficit hyperactivity disorder | 2,084                            | 1,166.9                 | 1.79       | 1,993                 | 1,084.8                 | 1.84       | 1.349 (1.189–1.530)       | 313                  | 118.1                   | 2.65       | 1.381 (1.218–1.566)       |
| Febrile convulsion                       | 2,912                            | 1,155.2                 | 2.52       | 2,908                 | 1,073.0                 | 2.71       | 1.069 (1.014–1.127)       | 367                  | 116.8                   | 3.14       | 1.222 (1.093–1.366)       |
| Epilepsy                                 | 527                              | 1,171.1                 | 0.45       | 577                   | 1,088.2                 | 0.53       | 1.179 (1.044–1.331)       | 78                   | 118.7                   | 0.66       | 1.430 (1.120–1.827)       |
| Immunological disorders                  |                                  |                         |            |                       |                         |            |                           |                      |                         |            |                           |
| Kawasaki disorder                        | 1,234                            | 1,161.2                 | 1.06       | 1,159                 | 1,079.4                 | 1.07       | 1.009 (0.930–1.095)       | 102                  | 118.1                   | 0.86       | 0.820 (0.666–1.010)       |
| Idiopathic thrombocytopenic purpura      | 126                              | 1,172.8                 | 0.11       | 126                   | 1,090.3                 | 0.12       | 1.051 (0.817–1.353)       | 13                   | 119.0                   | 0.11       | 0.957 (0.528–1.735)       |
| Cancer                                   | 192                              | 1172.2                  | 0.16       | 165                   | 1,089.9                 | 0.15       | 0.910 (0.734–1.125)       | 19                   | 119.0                   | 0.16       | 0.973 (0.599–1.580)       |

Abbreviations, n, number; PY, person-year; IR, incidence rate; aHR, adjusted hazard ratio; CI, confidence interval; ICU, intensive care unit; URI, upper respiratory infection; LRI, lower respiratory infection.

<sup>1</sup>Children were classified based on their feeding patterns in infancy by using polytomous variable latent class analysis.

<sup>2</sup>Adjusted hazard ratios and their 95% confidence intervals were calculated using a Cox proportional hazard model, with adjustments for sex, region at birth, economic status, birthweight, body weight at 4–6 and 9–12 months of age, head circumference at 4–6 months of age, perinatal comorbidities, and comorbidities.

**Supplemenatary Table S5. Associations of overweight/obesity at 6 years of age with the feeding pattern in infancy**

|                             | Total N | N of events (%) | RR    | 95% CI      | Adjusted RR | 95% CI      |
|-----------------------------|---------|-----------------|-------|-------------|-------------|-------------|
| Overweight (z-score >1.036) |         |                 |       |             |             |             |
| Cluster 1                   | 39,433  | 12,834 (32.55)  | Ref   | -           | Ref         | -           |
| Cluster 2                   | 37,097  | 12,242 (33.00)  | 1.026 | 1.001–1.052 | 1.067       | 1.040–1.094 |
| Cluster 3                   | 4,362   | 1,548 (35.49)   | 1.188 | 1.188–1.127 | 1.178       | 1.116–1.243 |
| Obesity (z-score >1.0645)   |         |                 |       |             |             |             |
| Cluster 1                   | 39,433  | 4,989 (12.65)   | Ref   | -           | Ref         | -           |
| Cluster 2                   | 37,097  | 4,825 (13.01)   | 1.040 | 1.000–1.082 | 1.086       | 1.043–1.131 |
| Cluster 3                   | 4,362   | 671 (15.38)     | 1.325 | 1.223–1.436 | 1.273       | 1.172–1.383 |

Figure S1. The model's fit indices of the Latent Class Models

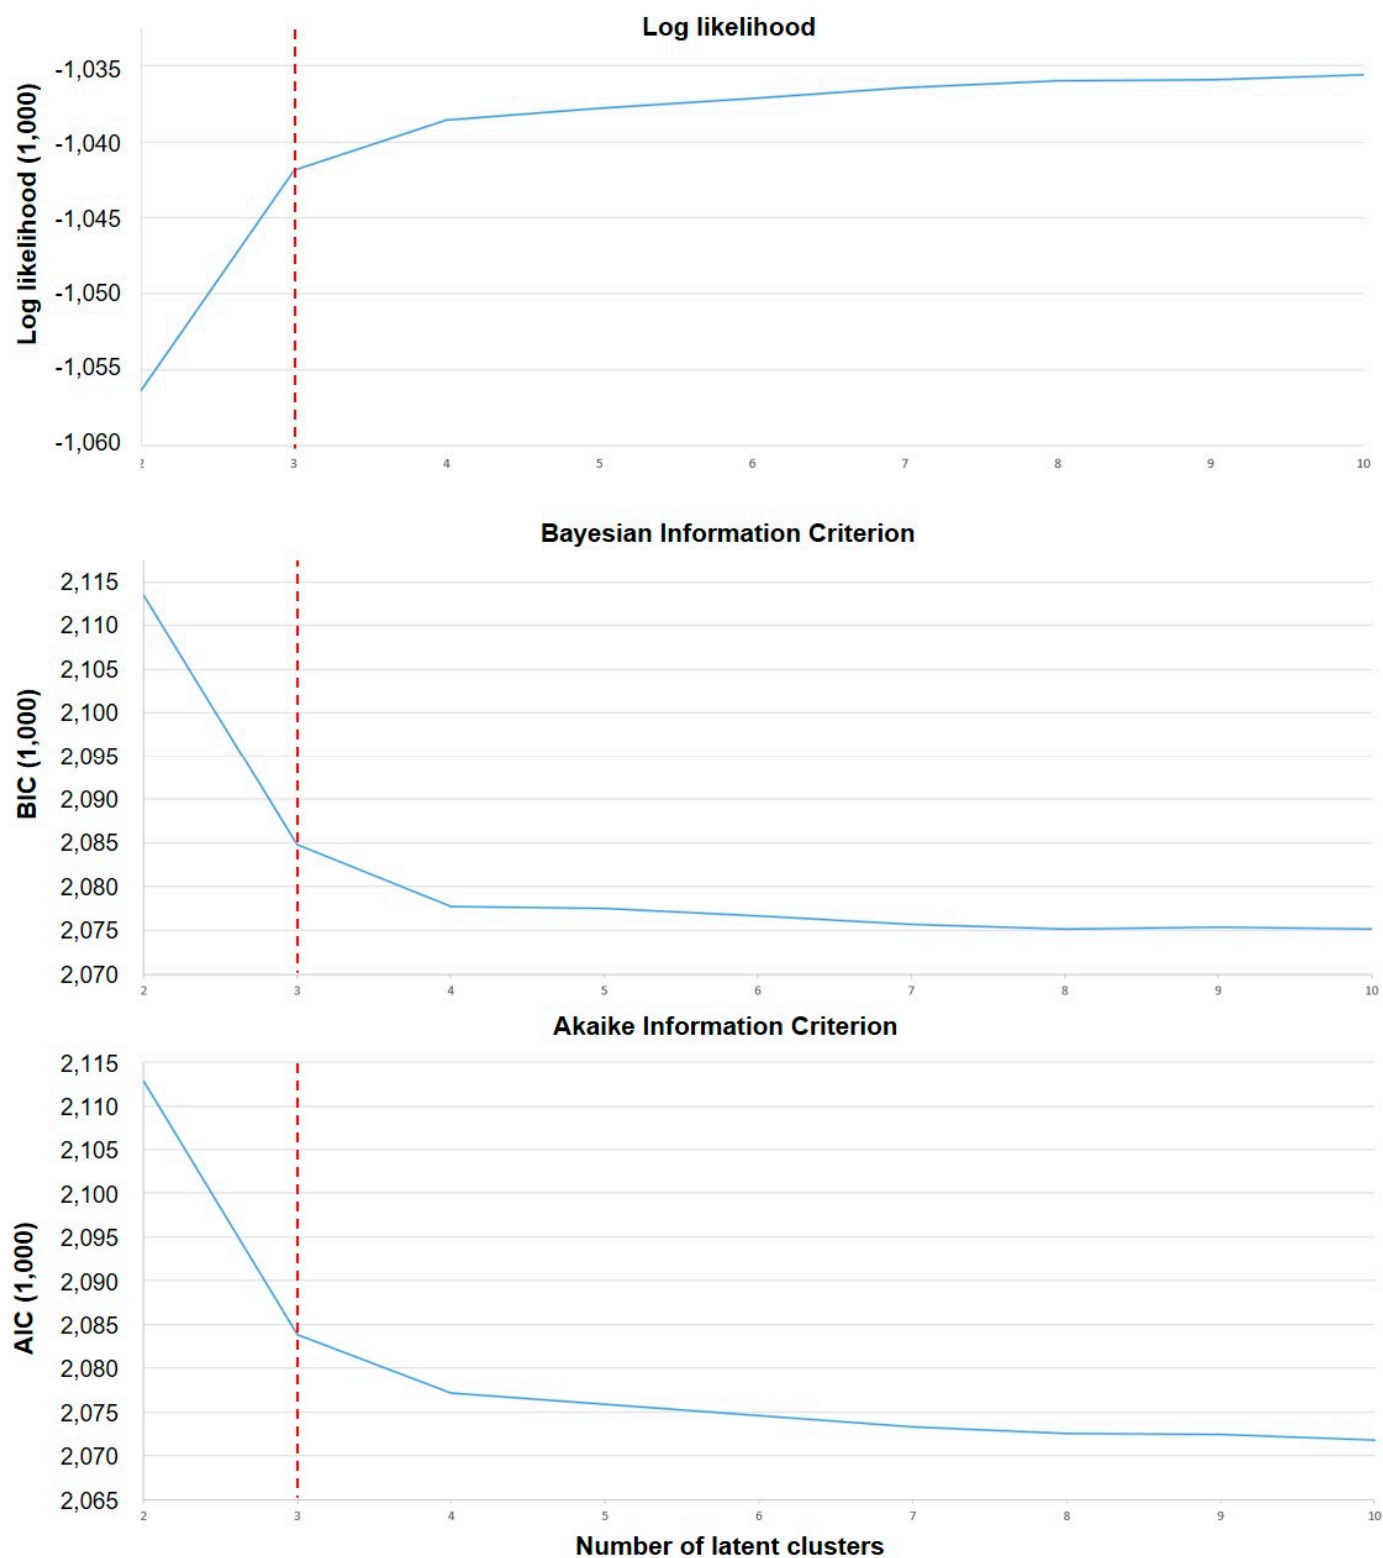

AIC, Akaike Information Criterion; BIC, Bayesian Information Criterion

## References

1. Ha EK, Lee SW, Kim JH, et al. Changes in childhood growth after adenotonsillectomy: a population-based cohort study. *Sleep Medicine*. 2022;89:114-121.
2. Lin S-C, Lin H-W, Chiang B-L. Association of croup with asthma in children: A cohort study. *Medicine*. 2017;96(35).
3. Chang Y-P, Yang C-J, Hu K-F, et al. Risk factors for pneumonia among patients with Parkinson's disease: a Taiwan nationwide population-based study. *Neuropsychiatric Disease and Treatment*. 2016;12:1037.
4. Kim JH, Ha EK, Lee SW, et al. Growth pattern during early infancy, body mass index during childhood and childhood asthma. *Clinical & Experimental Allergy*. 2022.
5. Kim JH, Lee SW, Kwon Y, et al. Infantile Colic and the Subsequent Development of the Irritable Bowel Syndrome. *Journal of Neurogastroenterology and Motility*. 2022;28(4):618-629.
6. Goff SL, Feld A, Andrade SE, et al. Administrative data used to identify patients with irritable bowel syndrome. *Journal of clinical epidemiology*. 2008;61(6):617-621.
7. Kim JH, Yi YY, Ha EK, et al. Neurodevelopment at 6 years of age in children with atopic dermatitis. *Allergology International*. 2022.
8. Chiang K-L, Cheng C-Y. Prevalence and neuro-psychiatric comorbidities of pediatric epilepsy in Taiwan: a national population-based study. *Epilepsy research*. 2014;108(8):1451-1460.
9. Kwak JH, Ha EK, Kim JH, et al. Association of Familial History of Diabetes, Hypertension, Dyslipidemia, Stroke, or Myocardial Infarction With Risk of Kawasaki Disease. *Journal of the American Heart Association*. 2022;11(12):e023840.
10. Hung GY, Lee CY, Yen HJ, Lin LY, Horng JL. Incidence of immune thrombocytopenia in Taiwan: a nationwide population-based study. *Transfusion*. 2018;58(11):2712-2719.
11. Lin H-C, Chao Y-H, Wu K-H, et al. Increased risk of herpes zoster in children with cancer: A nationwide population-based cohort study. *Medicine*. 2016;95(30).
